# Supplementary material
Source: PubMed Central journal article supplement (PMC8364378)
Supplement: NIHMS1723546-supplement-Supplementary_Material_-.pdf [file NIHMS1723546-supplement-Supplementary_Material_-.pdf]

**Cell, Volume 183**

## **Supplemental Information**

### **A Blueprint for Characterizing Senescence**

**Ananda L. Roy, Felipe Sierra, Kevin Howcroft, Dinah Singer, Norman Sharpless, Richard J. Hodes, Elizabeth L. Wilder, and James M. Anderson**

**Supplementary Table 1**  
**NIH Cellular Senescence Virtual Meeting Participants (held in April, 2020)**

| <b>Participants</b>          | <b>Affiliations</b>                              |
|------------------------------|--------------------------------------------------|
| Darren Baker                 | Mayo Clinic                                      |
| Anil Bhushan                 | University of California, San Francisco          |
| Judy Campisi                 | Buck Institute for Aging Research                |
| Ana Maria Cuervo             | Albert Einstein College of Medicine              |
| Nathaniel David              | Unity Biotechnology                              |
| Ron DePinho                  | MD Anderson Cancer Center                        |
| Jennifer Elisseeff           | Johns Hopkins University                         |
| Mike Elowitz                 | California Institute of Technology               |
| Kristen Fortney              | BioAge Labs                                      |
| Myriam Gorospe               | National Institute on Aging, NIH                 |
| George Hajishengallis        | University of Pennsylvania                       |
| LaTonya Hickson              | Mayo Clinic                                      |
| Juan Carlos Izpisua-Belmonte | Salk Institute                                   |
| Jamie Justice                | Wake Forest University                           |
| Dean Kellogg                 | Univ of Texas Health Science Center, San Antonio |
| Brian Kennedy                | Buck Institute for Aging Research                |
| James Kirkland               | Mayo Clinic                                      |
| Scott Lowe                   | Memorial Sloan Kettering Cancer Center           |
| John C Marioni               | European Bioinformatics Institute                |
| Anoop Nambiar                | Univ of Texas Health Science Center, San Antonio |
| Laura Niedernhofer           | University of Minnesota                          |
| Miranda Orr                  | Wake Forest University                           |
| Viviana I. Perez             | Oregon State University                          |
| Marc Ramis-Castelltort       | Senolytic Therapeutics Inc.                      |
| Aviv Regev                   | Broad Institute                                  |
| Wolf Reik                    | Babraham Institute                               |
| Paul Robbins                 | Mayo Clinic                                      |
| Clifford Rosen               | Maine Medical Center Research Institute          |
| John Sedivy                  | Brown University                                 |
| Manuel Serrano               | Institute for Research in Biomedicine, Madrid    |
| David Sinclair               | Harvard University                               |
| Sheila Stewart               | Washington University                            |
| Tamara Tchkonja              | Mayo Clinic                                      |
| Jan van Deursen              | Mayo Clinic                                      |
| Eric Verdin                  | Buck Institute for Aging Research                |
| Dennis Villareal             | Baylor College of Medicine                       |
| Daojing Wang                 | Newomics Inc.                                    |
| Lani Wu                      | University of California, San Francisco          |
| Ming Xu                      | University of Connecticut                        |
| Hanadie Yousef               | Juvena Therapeutics                              |
| Rugang Zhang                 | The Wistar Institute                             |
| Alex Zhavoronkov             | InSilico Medicine                                |

## NIH Participants

Kristin Abraham  
James Anderson  
Paul Barrett  
Andrew Bremer  
Tony Casco  
Preethi Chander  
Amanda DiBattista  
Yih-Woei Fridell  
Paige Green  
Deborah K. Hoshizaki  
Richard Hodes  
Kevin Howcroft  
Chamelli Jhappan  
Pragati Katiyar  
Ron Kohanski  
Michael Kurilla

Linnia Mayeenuddin  
Dan Miller  
Mahua Mukhopadhyay  
Youngsuk Oh  
Mercy Prabhudas  
Laura Rowland  
Ananda Roy  
Irina Sazonova  
Ned Sharpless  
Felipe Sierra  
Dinah Singer  
Erica Spotts  
Merriline Vedamony  
Yisong Wang  
Betsy Wilder  
Xincheng (Ted) Zheng
